# Supplementary material
Source: PubMed Central journal article supplement (PMC3390840)
Supplement: 1205606109_pnas.1205606109_SI.pdf [file 1205606109_pnas.1205606109_SI.pdf]

# Supporting Information

Bruss and Grason 10.1073/pnas.1205606109

## SI Text

**Algorithm for Asymptotically Close-Packed Bundles.** Here, we describe the deterministic algorithm used to construct the core packing of asymptotically close-packed twisted bundles. This algorithm proceeds by sequentially adding new filaments to an existing cluster of close-packed filaments. In essence, it is based on Rubinstein and Nelson's 2D generalization (1, 2) of Bennett's algorithm of close-packed clusters of spheres in 3D (3). Given a cluster of close-packed filaments, the algorithm proceeds as follows. First, it searches for all available pockets of close contact on the surface of the cluster. A pocket is defined by the position of a filament center that is in contact with two filaments of the cluster (where contact is defined by the condition  $\Delta_* = d$ ) and that is nonoverlapping ( $\Delta_* \geq d$ ) for all other filaments in the cluster. After the list of available pockets is tabulated, a new filament is added to the cluster in the pocket furthest from the bundle center. The algorithm repeats until the core the bundle has no available filament pockets.

To generate bundle packings that are asymptotically dense, we seed the packing with an initial "collar" of filaments at a large radius, which is consistent with the hexagonal symmetry of close packed at  $\rho \rightarrow \infty$ . To construct this collar, we exploit the fact that the metric geometry of bundles becomes nearly Euclidean, with the topology of a cylinder, far from the bundle core  $\Omega\rho \gg 1$ . The integer pair  $(n, m)$  defines the wrapping vector,  $\mathbf{P}(n, m)$ , as in Eq. 10. As shown in Fig. S1, starting from an initial position in the hexagonal lattice of spacing  $d$ ,  $n$  disks are arrayed along the lattice vector  $\mathbf{a}_1$  followed by  $m$  disks arrayed along the lattice vector  $\mathbf{a}_2$ . Identifying the first and last lattice position in this sequence, separated by the vector  $\mathbf{P}(n, m)$ , the array of  $n + m$  disks is rolled up along  $\mathbf{P}(n, m)$  into a collar encircling a cylindrical surface (see Fig. S1). Placing the initial disk at an arc distance,  $5P + \delta\rho$  from the pole of the bundle-equivalent dome, the radial and angular positions of disks in the collar are used to define the initial cluster of filaments in the packing. The value of  $\delta\rho$  is discussed below. We assume that the packing maintains the hexagonal geometry of the initial collar for filaments further from the core, so that regions outside of this collar are fully packed, and further filaments are only added at positions within this initial collar until the core is fully occupied.

To measure the density of packing within the core of the bundle, defined to be a region within a radial distance  $\rho_{\text{core}} = 3P$  from the bundle center, we calculate the occupied area within the filament cross-sections in this central region,  $A(\rho_{\text{core}})$ . The volume fraction of the core is simply  $\Phi(\rho_{\text{core}}) = A(\rho_{\text{core}}) / \pi\rho_{\text{core}}^2$ . Because of periodic oscillations in the number of filaments intersected by the core boundary, the value of area (or volume) fraction is highly sensitive to the value of  $\rho_{\text{core}}$ , exhibiting oscillations on length scales corresponding to the periodic symmetry of the packing far from the core (as shown in Fig. S1). To construct a measure of packing fraction less sensitive to the well-packed structure at the boundary of the core, we define the packing fraction as the average of  $\Phi(\rho_{\text{core}})$  over the narrow range of core radii  $3P - \delta/2 < \rho_{\text{core}} < 3P + \delta/2$ ,

$$\Phi = \frac{1}{\delta} \int_{-\delta/2}^{\delta/2} d\rho_{\text{core}} \Phi(\rho_{\text{core}}), \quad [\text{S1}]$$

where  $\delta = d \sin(\psi + \pi/3)$  defines a radial shift of the packing consistent with the hexagonal symmetry of asymptotic close packing. Here,  $\sin \psi = |\mathbf{n}\mathbf{a}_1 \times m\mathbf{a}_2|$ , as shown in Fig. S1. Fig. S2 shows that this definition of packing fraction varies smoothly with the

core radius, providing a more robust measure of packing efficiency in the bundle.

Given the initial collar configuration, the packing algorithm fills the core via a deterministic sequence of filament additions. However, whereas the packing density of the bundle outside of the collar is degenerate with respect to changes of initial radial position of the collar filaments, the core packing structure of the bundle is highly sensitive to shifts in  $\delta\rho$ . Thus, for a given integer pair  $(n, m)$ , the packing algorithm is repeatedly performed with the initial collar position shifted over a narrow range  $-\delta/2 < \delta\rho < +\delta/2$ . The optimal packing geometry corresponds to the largest value of  $\Phi$  achieved for this sequence of collar radii.

**Triangulation of Twisted Bundle Packings.** Interfilament distance in twisted bundles is not preserved when the cross-sectional packing is projected into the plane (as in a horizontal cross-section of the bundle shown in Fig. S1), and hence, determination of the nearest-neighbor bond network requires some care. A very efficient and sufficiently accurate method is to map the filament positions onto the plane via a coordinate transformation that rescales local interfilament distances in different directions (radially and azimuthally) by nearly equivalent amounts and then perform the standard planar Delaunay triangulation on the transformed array. That is, we use the isothermal coordinate map of filament position  $(\rho, \phi)$  in the horizontal section to position  $(\bar{\rho}, \phi)$  in the plane. Such transformation is conformal and, as a consequence, it maps infinitesimal circles on the dome to circles in the plane. For sufficiently small, but finite-size, circles (i.e.,  $d/P \lesssim 1$ ), the Delaunay triangulation of the mapped positions will give the identical connectivity of nearest neighbors as a triangulation based on true geodesic distances on the bundle-equivalent dome.

The coordinate transformation is described by the function  $\bar{\rho}(\rho)$  that transforms twisted bundle metric of Eq. 5 into the following form,

$$ds^2 = \omega^2(\bar{\rho})(d\bar{\rho}^2 + \bar{\rho}^2 d\phi^2), \quad [\text{S2}]$$

where  $\omega(\bar{\rho})$  describes the conformal scaling of area elements. This transformation satisfies

$$\bar{\rho} \frac{\partial \bar{\rho}}{\partial \rho} = \Omega^{-1} \sin \theta(\rho), \quad [\text{S3}]$$

from which we find

$$\bar{\rho} = \frac{\rho}{1 + \sqrt{1 + (\Omega\rho)^2}} e^{\sqrt{1 + (\Omega\rho)^2}}, \quad [\text{S4}]$$

and  $\omega(\rho) = [1 + \cos \theta(\rho)] e^{\sec \theta(\rho)}$ . In Fig. S3, we show the planar section of a (5, 5) bundle as well as the conformal transform of the cross-section and corresponding triangulation. Note that, for this bundle,  $d/P = 0.12$ , so that filament cross-sections are very nearly circular in the projection.

## Energy Minimization of Self-Assembled Twisted Filament Bundles.

Here, we detail the protocol for numerically minimizing the energy of adhesive filament bundles. For a given filament number,  $N$  and helical twist,  $\Omega$ , every minimization was initialized with a random distribution of filament positions in the 2D plane. Given the in-plane coordinates of all filaments, the in-plane gradients of the total energy with respect to filament positions (the forces) are calculated making use of the analytical approximation for
